# Supplementary material for: Upregulation of BDNF and hippocampal functions by a hippocampal ligand of PPARα
Source: JCI journal article supplement (doi:10.1172/jci.insight.136654), 2020-04-21
Supplement: sd1 [file 1]

## **Upregulation of BDNF and hippocampal functions by a hippocampal ligand of PPAR $\alpha$**

**Dhruv Patel <sup>1</sup>, Avik Roy <sup>1,2</sup>, Sumita Raha <sup>1</sup>, Madhuchhanda Kundu <sup>1</sup>, Frank J. Gonzalez <sup>3</sup>,  
and Kalipada Pahan <sup>1,2</sup>**

<sup>1</sup>Department of Neurological Sciences, Rush University Medical Center, Chicago, IL; <sup>2</sup>Division of Research and Development, Jesse Brown Veterans Affairs Medical Center, 820 South Damen Avenue, Chicago, IL; <sup>3</sup>Laboratory of Metabolism, Center for Cancer Research, National Cancer Institute, National Institutes of Health, Bethesda, USA

**Running title:** Improving hippocampal functions by a hippocampal drug

**Conflict of interest statement:** The authors have declared that no conflict of interest exists.

To whom correspondence should be addressed:

Kalipada Pahan, Ph.D.  
Department of Neurological Sciences  
Rush University Medical Center  
1735 West Harrison St, Suite 310  
Chicago, IL 60612  
Tel# (312) 563-3592  
Fax# (312) 563-3571  
Email: [Kalipada\\_Pahan@rush.edu](mailto:Kalipada_Pahan@rush.edu)

## SUPPLEMENTAL INFORMATION

### MATERIALS AND METHODS

**Isolation of mouse hippocampal neurons:** Dissociated hippocampal neuronal cultures were prepared from fetuses (E18) of pregnant *Ppara*-null mice and strain-matched C57BL6 littermate mice using methods similar to those described earlier with few modifications (1-4). Briefly, hippocampi from fetal pups ( $n > 10$ ) were isolated as a thin slice of tissue near the cortical edge of the medial temporal lobe and placed together in the Dulbecco's Modified Eagle Medium/Nutrient Mixture F-12 (DMEM/F12) media supplemented with 10% heat-inactivated fetal bovine serum. Cells were dissociated by trituration and single cell suspension was plated in a poly-D-lysine pre-coated 6 wells plate containing complete DMEM/F12 media. After cell attachment (5 mins after plating), the DMEM/F12 media was replaced with Neurobasal Medium supplemented with B27 supplements (*Life Technologies*). Next day, 10 $\mu$ M AraC was added to remove glial contamination in the neuronal culture. Experiments were done in 9-10 day old pure hippocampal neuronal cultures. Immediately before experimental treatment, the medium was replaced with Neurobasal Medium without B27 supplements.

**Immunofluorescence analyses of primary hippocampal neurons:** After hexadecanamide treatment, primary hippocampal neurons were washed three times with 1X PBS, fixed in 4% paraformaldehyde for 10 min or with chilled methanol overnight, washed again with 1X PBS and incubated first with monoclonal or polyclonal primary antibodies (**Table S1**) and then with the Cy2 or Cy5 conjugated secondary antibodies. Following secondary antibody incubation, coverslips were rinsed in 1X PBS, mounted on slides in Fluoromount (*Sigma*) and imaged using an *Olympus BX41* fluorescent microscope equipped with a *Hamamatsu ORCA-03G* camera.

**Semi-quantitative RT-PCR:** Total RNA was isolated from the primary hippocampal neurons using *Quick-RNA<sup>TM</sup> MiniPrep kit* (ZYMO RESEARCH Inc, Catalog Nos. R1054 & R1055) following the manufacturer's protocol. Isolated total RNA was digested with DNase and RT-PCR was carried out as described earlier (1, 5, 6) using the RT-PCR kit from *Clontech* and the primers (Table S2). GAPDH (glyceraldehyde-3-phosphate dehydrogenase) was used to ascertain that an equivalent amount of cDNA was synthesized from different samples.

**Real-time PCR:** Real-time PCR analysis was performed in the *ABI-Prism7700* sequence detection system (*Applied Biosystems*) as described earlier (1, 6). Complementary DNA (cDNA) was created using *TaqMan Universal Master Mix* and amplified with *SYBR Green-conjugated PCR master mix* (*Applied Biosystems*) and the primers listed in Table S2. Data were processed by the *ABI Sequence Detection System 1.6* software and analyzed by the relative  $2^{-\Delta\Delta CT}$  method.

**Immunoblotting and densitometric analyses:** For whole cell and tissue lysates, samples were homogenized in RIPA buffer + protease and phosphatase inhibitors (*Sigma*), rotated end over end for 30 min at 4°C and centrifuged for 10 min at 15,000g. The supernatant was aliquoted and stored at -80°C until use. Protein concentrations were determined using a *NanoDrop 2000* (*Thermo Fisher*), and 15-30 µg sample was heat-denatured and resolved on 12% or 15% polyacrylamide-SDS gels in MES buffer (50 mM MES, 50 mM Tris base, 0.1% SDS, 1 mM EDTA, pH 7.3) or 1X SDS Running Buffer. Proteins were transferred to 0.45µm nitrocellulose membranes in Towbin Buffer (25 mM Tris, 192 mM glycine, 20% (w/v) methanol) under wet conditions (40V for 120 mins). Membranes were blocked for 1 hr with blocking buffer (*Li-Cor*), incubated with primary antibodies (Table S1) overnight at 4°C under shaking conditions, washed, incubated with IR-dye labeled secondary antibodies (1:5,000; *Li-Cor*) for 45 min at room temperature, washed and visualized with the

*Odyssey Infrared Imaging System (Li-Cor)*. Blots were converted to binary, analyzed using ImageJ (NIH) and normalized to the loading control ( $\beta$ -actin).

**Immunofluorescence analyses for hippocampal tissue sections:** After 1 month Hex treatment, mice were anesthetized and perfused with PBS (pH 7.4) and then with 4% (w/v) paraformaldehyde solution in PBS followed by hemisection of the brain and isolation of hippocampus from each dissected brains for immunofluorescence microscopy **(6-8)**. Briefly, hemisected brains were incubated in PBS containing 0.05% Tween 20 (PBST) and 10% sucrose for 3 h and then 30% sucrose overnight at 4°C. Hemisected brains was then embedded in O.C.T (Tissue Tech) at -80°C and processed for conventional cryosectioning. Frozen hippocampal sections (40 micron thick) were treated with cold ethanol (-20°C) followed by two rinses in PBS, blocking with 3% bovine serum albumin in PBST and double labeling with two antibodies (**Table S1**). After three washes in PBST, sections were further incubated with Cy2 and Cy5 (*Jackson ImmunoResearch Laboratories, Inc.*). The samples were mounted and observed under the *Olympus BX41* fluorescent microscope equipped with a *Hamamatsu ORCA-03G* camera. Captured images were calibrated with the scale bar and then opened in *ImageJ* software for further quantification analysis. For PSD95 puncta numbers assessment, a touch count tool was used to quantify the number of PSD95 + MAP2-ir signals (yellow colored punctas) in the specific regions of hippocampus (CA1 and DG region). 10 independent images per group were included in the counting. While measuring BDNF MFI, a closed square tool was used to draw the boundary around BDNF and MAP2-ir signals followed by monitoring MFI using *ImageJ* software. The final MFI was analyzed after subtracting the value with the background signal of respective images.

**Barnes maze and T maze:** Maze experiments were performed as described by us **(1, 5, 6)**. Briefly, for Barnes maze, mice were trained for 2 consecutive days followed by examination on day 3. During

training, the overnight food-deprived mouse was placed in the middle of the maze in a 10 cm high cylindrical start chamber. After 10 s, the start chamber was removed to allow the mouse to move around the maze to find out the color food chips in the baited tunnel. The session was ended when the mouse entered the baited tunnel. The tunnel was always located underneath the same hole (stable within the spatial environment). After each training session, maze and escape tunnel were thoroughly cleaned with a mild detergent to avoid instinctive odor avoidance due to mouse's odor from the familiar object. On day 3, a video camera (*Basler Gen I Cam - Basler acA 1300-60*) connected to a *Noldus* computer system was placed above the maze and was illuminated with high wattage light that generated enough light and heat to motivate animals to enter into the escape tunnel. The performance was monitored by the video tracking system (*Noldus System*). Cognitive parameters were analyzed by measuring latency (duration before all four paws were on the floor of the escape box) and errors (incorrect responses before all four paws were on the floor of the escape box). For T-maze, mice were also habituated in the T-maze for two days under food-deprived conditions so that animals can eat food rewards at least five times during 10 minutes period of training. During each trial, mice were placed in the start point for 30 s and then forced to make a right arm turn which was always baited with color food chips. On entering the right arm, they were allowed to stay there for 30-45 s, then returned to the start point, held for 30 s and then allowed to make right turn again. As described above, after each training session, T-maze was thoroughly cleaned with a mild detergent. On day 3, mice were tested for making positive turns and negative turns. The reward side is always associated with a visual cue. The number of times the animal eats the food reward would be considered as a positive turn.

**Novel object recognition task (NORT):** Novel object recognition task was performed to monitor the short-term memory as described by others (9) and us (1). Briefly, during training, mice were

placed in the NORT testing apparatus comprised of a wooden floor square arena of 40 cm long and 40 cm wide, with walls 30 cm high. Two plastic toys (between 6 and 7 cm) that varied in color, shape, and texture were placed in specific locations in the environment 30 cm away from each other. The mice were able to explore freely the environment and objects for 15 min and then were placed back into their individual home cages. After 30 min, mice were placed back into the environment with two objects in the same locations, but now one of the familiar objects was replaced with a third novel object. The mice were then again allowed to explore freely both objects for 15 min. The objects were thoroughly cleaned with a mild detergent. A video camera (*Basler Gen I Cam - Basler acA 1300-60*) connected to a *Noldus computer system* was placed above the box. Each mouse was placed individually on the center of the NORT arena and the performance was monitored by the live video tracking system (*Noldus System*).

**Open field test (OFT):** The Open Field tests were performed as described earlier (10, 11) with slight modifications and used to assess spontaneous exploratory activity. Briefly, each mouse was allowed to freely explore an open field arena for 5 min. The testing apparatus was a classic open field (i.e., a wooden floor square arena, 40 × 40 cm, with walls 30 cm high). A video camera (*Basler Gen I Cam - Basler acA 1300-60*) connected to a *Noldus computer system* was placed above the box. Each mouse was placed individually on the center of the arena and the performance was monitored by the live video tracking system (*Noldus System*). Exploratory parameters in OFT that were analyzed include total distance traveled by the mice during 5 min of free exploration in the open field arena and the velocity with which this distance was covered.

**Table S1. Antibodies, sources, applications and dilutions used in this study.**

| <b>Protein</b> | <b>Antibody (Clone)</b>     | <b>Epitope/Immunogen</b>                                                                              | <b>Application - Dilution</b> | <b>Source (Catalog)</b> |
|----------------|-----------------------------|-------------------------------------------------------------------------------------------------------|-------------------------------|-------------------------|
| <b>BDNF</b>    | Sheep polyclonal            | Synthetic peptide from human mature BDNF                                                              | WB – 1:1000                   | Abcam (ab75040)         |
|                |                             |                                                                                                       | IF – 1:200                    |                         |
|                |                             |                                                                                                       | IF – 1:200                    |                         |
| <b>TrkB</b>    | Rabbit monoclonal (80E3)    | Synthetic peptide surrounding Pro50 of human TrkB                                                     | WB – 1:1000                   | Cell Signaling (#4603)  |
| <b>MAP2</b>    | Rabbit polyclonal           | Purified rat MAP-2                                                                                    | IF – 1:1000                   | Millipore (AB5622)      |
| <b>NR2A</b>    | Rabbit monoclonal (EPR7063) | Recombinant protein fragment corresponding to a region within Human NMDAR2A (Q12879)                  | WB – 1:1000                   | Abcam (ab133265)        |
| <b>GLUR1</b>   | Rabbit polyclonal           | Synthetic peptide corresponding to Human Glutamate Receptor 1 (AMPA subtype) aa 850 to the C-terminus | WB – 1:1000                   | Abcam (ab31232)         |
| <b>NT3</b>     | Chicken polyclonal          | Synthetic peptide based on the human NT3 protein                                                      | IF – 1:100                    | ThermoFisher (PA1-9520) |
| <b>PSD95</b>   | Mouse monoclonal (6G6-1C9)  | Recombinant full-length protein                                                                       | WB – 1:1000                   | Abcam (ab2723)          |
|                |                             |                                                                                                       | IF – 1:200                    |                         |
| <b>β actin</b> | Mouse monoclonal (AC-15)    | a.a. 1-15 of <i>Xenopus laevis</i> β actin                                                            | WB – 1:5000                   | Abcam (ab6276)          |

**Table S2. Primers used for RT-PCR and real-time PCR analyses.**

| <b>Gene</b>              | <b>Forward Primer (5' to 3')</b> | <b>Reverse Primer (5' to 3')</b> |
|--------------------------|----------------------------------|----------------------------------|
| <i>Bdnf</i>              | AGGCAACTTGGCCTACCCAGGTG<br>TG    | TACTGTCACACACGCTCAGCTCCCC        |
| <i>Gapdh</i>             | GCACAGTCAAGGCCGAGAAT             | GCCTTCTCCATGGTGGTGAA             |
| <i>NT3</i>               | GAGAGGCCACCAGGTCAGAGTTC<br>CA    | GTCATCAATCCCCCTGCAACCGTTT        |
| <i>NT4</i>               | AGCGTTGCCTAGGAATACAGC            | GGTCATGTTGGATGGGAGGTATC          |
| <i>p75<sup>NTR</sup></i> | CAGACGATGCCGTGTGCCGA             | CAGGGCGTGCACTCGCGTAA             |
| <i>TrkB</i>              | CCGGCACTGTCCTGCTACCG             | CCTTCCCTGCGCCCTCTTGC             |



**Table S3. Primers used for mRNA-based microarray analysis of plasticity-associated genes.**

| UniGene   | GenBank   | Symbol        | Description                                                                        | Primer Sequence               |                               |
|-----------|-----------|---------------|------------------------------------------------------------------------------------|-------------------------------|-------------------------------|
|           |           |               |                                                                                    | Forward                       | Reverse                       |
| Mm.347452 | NM_010623 | <i>Kif17</i>  | Kinesin family member 17                                                           | CGAGAGTCG<br>AGCTGGGATG<br>AG | TCTCACTGTCG<br>CTTCGGCTG      |
| Mm.4292   | NM_013692 | <i>Klf10</i>  | Kruppel-like factor 10                                                             | CATGCTCAAC<br>TTCGGCGCTT      | TCCAGTCGCAG<br>CTCATGGAC      |
| Mm.196581 | NM_011949 | <i>Mapk1</i>  | Mitogen-activated protein kinase 1                                                 | GCTCTGGCCC<br>ACCCATACCT      | GTCCTCTGAGC<br>CCTTGTCTGA     |
| Mm.4406   | NM_013599 | <i>Mmp9</i>   | Matrix metalloproteinase 9                                                         | TCCAGACCAA<br>GGGTACAGCC      | AGGCCTTGGGT<br>CAGGCTTAG      |
| Mm.4974   | NM_010875 | <i>Ncam1</i>  | Neural cell adhesion molecule 1                                                    | TGGGCCTGAA<br>ACCTGAGACG      | AGCTTGGGTGC<br>ACTGGGTTC      |
| Mm.256765 | NM_008689 | <i>Nfkb1</i>  | Nuclear factor of kappa light polypeptide gene enhancer in B-cells 1, p105         | GGTGCGCCTC<br>ATGTTACAG       | AATCTCCTCCC<br>CTCCCGTCA      |
| Mm.220333 | NM_010908 | <i>Nfkbib</i> | Nuclear factor of kappa light polypeptide gene enhancer in B-cells inhibitor, beta | AGAGAACGA<br>AGAGGAGCC<br>GC  | AGCCGGACCA<br>TCTCTGCATC      |
| Mm.1259   | NM_013609 | <i>Ngf</i>    | Nerve growth factor                                                                | GGAGCGCATC<br>GAGTGACTT       | GGTGAGCTTG<br>GGTCCAGCAT      |
| Mm.283893 | NM_033217 | <i>Ngfr</i>   | Nerve growth factor receptor (TNFR superfamily, member 16)                         | GCCCAGAGG<br>GCACATACTC<br>A  | GGGGGCGTAG<br>ACCTTGTGAT      |
| Mm.44249  | NM_008712 | <i>Nos1</i>   | Nitric oxide synthase 1, neuronal                                                  | GGAGGAGGA<br>TGCTGGTGTG<br>T  | GGAGGATCCA<br>GTTAGGAGCT<br>G |
| Mm.10099  | NM_016789 | <i>Nptx2</i>  | Neuronal pentraxin 2                                                               | GGTACGCCAT<br>TCTCCTACGC<br>T | TCTCCCCATCC<br>TGGAACGCT      |
| Mm.119    | NM_010444 | <i>Nr4a1</i>  | Nuclear receptor subfamily 4, group A, member 1                                    | TGCAGGAGG<br>CTGCGAAAGT<br>TG | GGCTCGTTGCT<br>GGTGTTCCAT     |

|           |           |                 |                                                                                   |                               |                           |
|-----------|-----------|-----------------|-----------------------------------------------------------------------------------|-------------------------------|---------------------------|
| Mm.267570 | NM_008742 | <i>Ntf3</i>     | Neurotrophin 3                                                                    | CCCCCGTCAG<br>CCAGGATAAT      | GCTGTTGCCTT<br>GGATGCCAC  |
| Mm.20344  | NM_198190 | <i>Ntf5</i>     | Neurotrophin 5                                                                    | CAGCCGGGG<br>AGCAGAGAA        | AGCACCTCCAC<br>CTCCTCACT  |
| Mm.130054 | NM_008745 | <i>Ntrk2</i>    | Neurotrophic<br>tyrosine kinase,<br>receptor, type 2                              | TCGACCCTCC<br>GGAATCATCT<br>C | CCGCTAAACC<br>GGCACGAAT   |
| Mm.390715 | NM_021543 | <i>Pcdh8</i>    | Protocadherin 8                                                                   | CGACGTGCTC<br>ACCTTCCCTG      | AGCCTGGAGA<br>GGCACCGTAA  |
| Mm.259464 | NM_008837 | <i>Pick1</i>    | Protein<br>interacting with<br>C kinase 1                                         | TCCGACCGGA<br>AGTGACGC        | GGTGACCTTCC<br>CAGGCACAG  |
| Mm.405293 | NM_008842 | <i>Pim1</i>     | Proviral<br>integration site 1                                                    | CTCCACCGCG<br>ACATCAAGG<br>A  | CTGCCGTGGTA<br>GCGATGGTA  |
| Mm.154660 | NM_008872 | <i>Plat</i>     | Plasminogen<br>activator, tissue                                                  | AAGAGGAGC<br>CCGGTCCTAC<br>A  | GGTTCGCTGCA<br>ACTTCGGAC  |
| Mm.44463  | NM_021280 | <i>Plcg1</i>    | Phospholipase C,<br>gamma 1                                                       | ACTCCAAGAA<br>GTCGCAGCGG      | TGGTAGCGGTC<br>AAAGTCCCG  |
| Mm.1970   | NM_031868 | <i>Ppp1ca</i>   | Protein<br>phosphatase 1,<br>catalytic subunit,<br>alpha isoform                  | TGTGCCAGCA<br>TCAACCGCAT      | GTGGGCCGCA<br>TAATACGCCT  |
| Mm.280784 | NM_013636 | <i>Ppp1cc</i>   | Protein<br>phosphatase 1,<br>catalytic subunit,<br>gamma isoform                  | TCTGCCTCTT<br>GCTGGCCTAC      | CTCGTCCACGA<br>TGGCTGCTA  |
| Mm.2343   | NM_026731 | <i>Ppp1r14a</i> | Protein<br>phosphatase 1,<br>regulatory<br>(inhibitor)<br>subunit 14A             | GTGGATCGAC<br>GGATGCTTGG      | GTTTGTGCAGG<br>CCCCGAAG   |
| Mm.260288 | NM_019411 | <i>Ppp2ca</i>   | Protein<br>phosphatase 2<br>(formerly 2A),<br>catalytic subunit,<br>alpha isoform | CTCACGTTGG<br>TGTCCAGAGC      | GGTGCTGGGTC<br>AAACTGCAAG |
| Mm.331389 | NM_008913 | <i>Ppp3ca</i>   | Protein<br>phosphatase 3,<br>catalytic subunit,<br>alpha isoform                  | CAGTCGGACG<br>GGACGAGC        | AGCCGGTGAC<br>TTGGTGGAAG  |
| Mm.222178 | NM_011101 | <i>Prkca</i>    | Protein kinase C,<br>alpha                                                        | GGGACCTGAC<br>ACTGACGACC      | TCCGCAGAGG<br>CTAGGGACAT  |
| Mm.7980   | NM_011102 | <i>Prkcc</i>    | Protein kinase C,<br>gamma                                                        | ACAATGTACC<br>GGTGGCCGAT      | TGGCACCAAA<br>GAAGCATCGC  |

|           |           |                 |                                                           |                               |                                  |
|-----------|-----------|-----------------|-----------------------------------------------------------|-------------------------------|----------------------------------|
| Mm.381172 | NM_011160 | <i>Prkg1</i>    | Protein kinase, cGMP-dependent, type I                    | CGCTCGGTGA<br>TCCGGC          | GCCTCCTTTAT<br>GAGATCCTTCG<br>AC |
| Mm.328431 | NM_007393 | <i>Actb</i>     | Actin, beta                                               | TGTCGAGTCG<br>CGTCCACC        | GATGGAGGGG<br>AATACAGCCC<br>G    |
| Mm.163    | NM_009735 | <i>B2m</i>      | Beta-2 microglobulin                                      | GGTCGCTTCA<br>GTCGTCAGCA      | GAGGCGGGTG<br>GAACTGTGTT         |
| Mm.343110 | NM_008084 | <i>Gapdh</i>    | Glyceraldehyde-3-phosphate dehydrogenase                  | CTGGATAAGC<br>AGGGCGGGA       | CCGTTTCACACC<br>GACCTTCAC        |
| Mm.3317   | NM_010368 | <i>Gusb</i>     | Glucuronidase, beta                                       | CAAGAAGCA<br>GCCCTTCGGG<br>A  | TCAGCCTCAAA<br>GGGGAGGTG         |
| Mm.2180   | NM_008302 | <i>Hsp90ab1</i> | Heat shock protein 90 alpha (cytosolic), class B member 5 | GGATGACATC<br>ACGCAGGAG<br>GA | CGGGGAATGA<br>AGAGCAATGC<br>C    |
| Mm.3037   | NM_007399 | <i>Adam10</i>   | A disintegrin and metallopeptidase domain 10              | GGGCTGGGA<br>GGTCAGTATG<br>G  | AGGGAAGTGT<br>CCCTCTTCATT<br>CG  |
| Mm.259733 | NM_009622 | <i>Adcy1</i>    | Adenylate cyclase 1                                       | GCTGTTCTCA<br>TGCACGCTGG      | GAAGTGCTGT<br>GCGACGTGAG         |
| Mm.1425   | NM_009623 | <i>Adcy8</i>    | Adenylate cyclase 8                                       | AGACCTATCT<br>GGCCCGCAAC      | AGTACTCTGGG<br>TAGGAGCAGA        |
| Mm.6645   | NM_009652 | <i>Akt1</i>     | Thymoma viral proto-oncogene 1                            | TAGGCCCACT<br>CGCCCG          | AGACAGGGGT<br>AACCCAGGGA         |
| Mm.25405  | NM_018790 | <i>Arc</i>      | Activity regulated cytoskeletal-associated protein        | ACACCAGGTC<br>TCAAGGCT        | CTTCAGGAGA<br>AGAGAGGATG<br>GT   |
| Mm.1442   | NM_007540 | <i>Bdnf</i>     | Brain derived neurotrophic factor                         | AGCCGCAAA<br>GAAGTTCCA        | CTTGTCCGTGG<br>ACGTTTACT         |
| Mm.131530 | NM_177407 | <i>Camk2a</i>   | Calcium/calmodulin-dependent protein kinase II alpha      | TTCCCAGCCT<br>AAAGCCTCGC      | CTGACCAGCC<br>AGCACCTTCA         |
| Mm.235182 | NM_178597 | <i>Camk2g</i>   | Calcium/calmodulin-dependent protein kinase II gamma      | AGGGTGCCAT<br>CCTCACAACC      | CTTGGGCTGGG<br>CTTACGAGA         |
| Mm.257437 | NM_007664 | <i>Cdh2</i>     | Cadherin 2                                                | ATGTGCACGA<br>AGGACAGCC<br>C  | CAGGAACCTTG<br>CCTGCTCTGC        |

|           |           |              |                                                                    |                               |                            |
|-----------|-----------|--------------|--------------------------------------------------------------------|-------------------------------|----------------------------|
| Mm.439656 | NM_009883 | <i>Cebpb</i> | CCAAT/enhancer binding protein (C/EBP), beta                       | CCGCCTTATA<br>AACCTCCCCG      | AGGCAGTCGG<br>GCTCGTAGTA   |
| Mm.347407 | NM_007679 | <i>Cebpd</i> | CCAAT/enhancer binding protein (C/EBP), delta                      | AACCCGCGGC<br>CTTCTACGAG      | TGTAGGCGCTG<br>AAGTCGATGG  |
| Mm.7992   | NM_007726 | <i>Cnr1</i>  | Cannabinoid receptor 1 (brain)                                     | TTGTAGCAGA<br>GAGCCAGCCC      | AGGTGGTATCT<br>GCAAGGCCG   |
| Mm.453295 | NM_133828 | <i>Creb1</i> | CAMP responsive element binding protein 1                          | AAACTCCAGC<br>GAGATCCGG<br>G  | TGGCTGGGCTT<br>GAACTGTCA   |
| Mm.5244   | NM_013498 | <i>Crem</i>  | CAMP responsive element modulator                                  | AAGAAGCAA<br>CTCGCAAGCG<br>G  | TTCTTCCTGCG<br>ACACTCCCG   |
| Mm.27256  | NM_007864 | <i>Dlg4</i>  | Discs, large homolog 4 (Drosophila)                                | AGATGAAGA<br>CACGCCCCCT<br>C  | CTGCAACTCAT<br>ATCCTGGGGCT |
| Mm.181959 | NM_007913 | <i>Egr1</i>  | Early growth response 1                                            | CAATCCTCAA<br>GGGGAGCCG<br>A  | TGATGGGAGG<br>CAACCGAGTC   |
| Mm.290421 | NM_010118 | <i>Egr2</i>  | Early growth response 2                                            | AGGCCGTAG<br>ACAAAATCCC<br>AG | AGGGGTCTCTT<br>CTCTCCAGTCA |
| Mm.103737 | NM_018781 | <i>Egr3</i>  | Early growth response 3                                            | TCAACCTCTT<br>CTCCGGCAGC      | TCAACCTCTTC<br>TCCGGCAGC   |
| Mm.44137  | NM_020596 | <i>Egr4</i>  | Early growth response 4                                            | CTCCACCTGA<br>GCGACTTCTC<br>C | TGCTCAAAGCC<br>CAGCTCAAGA  |
| Mm.250981 | NM_010142 | <i>Ephb2</i> | Eph receptor B2                                                    | TATGGGCGCT<br>ACAGTGGCA<br>A  | CGCTCAAACCC<br>CCGTCTGTTA  |
| Mm.246513 | NM_010234 | <i>Fos</i>   | FBJ osteosarcoma oncogene                                          | GAAGACCGT<br>GTCAGGAGG<br>CA  | CTCCTCCGATT<br>CCGGCACTT   |
| Mm.254629 | NM_010305 | <i>Gnai1</i> | Guanine nucleotide binding protein (G protein), alpha inhibiting 1 | GAGCCCCCTC<br>ACGATATGCT      | ATCTGTGGCGC<br>ACGTGAAGT   |
| Mm.4920   | NM_008165 | <i>Gria1</i> | Glutamate receptor, ionotropic,                                    | TTGCAACACC<br>CAAGGGGTCC      | GCACTCGCCCT<br>TGTCGTACC   |

|           |           |               |                                                    |                                  |                          |
|-----------|-----------|---------------|----------------------------------------------------|----------------------------------|--------------------------|
|           |           |               | AMPA1 (alpha 1)                                    |                                  |                          |
| Mm.220224 | NM_013540 | <i>Gria2</i>  | Glutamate receptor, ionotropic, AMPA2 (alpha 2)    | ACGACAAAG<br>GAGAGTGCG<br>GC     | AAACCAAGGC<br>CCCCGACAAG |
| Mm.327681 | NM_016886 | <i>Gria3</i>  | Glutamate receptor, ionotropic, AMPA2 (alpha 3)    | GCTCCTGCCA<br>CCAACACTCA         | CATTGCATGCT<br>TCCGGTGGG |
| Mm.209263 | NM_019691 | <i>Gria4</i>  | Glutamate receptor, ionotropic, AMPA2 (alpha 4)    | AAACTCAGTG<br>AGGCAGGCG<br>T     | TTGCTCAGGCT<br>CAAGGCACT |
| Mm.278672 | NM_008169 | <i>Grin1</i>  | Glutamate receptor, ionotropic, NMDA1 (zeta 1)     | GCGTGAGTCC<br>AAGGCAGAG<br>A     | CACACGTACCC<br>AGAGCCAGT |
| Mm.2953   | NM_008170 | <i>Grin2a</i> | Glutamate receptor, ionotropic, NMDA2A (epsilon 1) | ACCAGAGGG<br>GCGTAGAGG<br>AT     | GTACCCGCTCC<br>CAATGGTCA |
| Mm.436649 | NM_008171 | <i>Grin2b</i> | Glutamate receptor, ionotropic, NMDA2A (epsilon 2) | ACCCTGCCTC<br>TTGGGTTTCT<br>C    | CTCCATAGAGC<br>CAAGCCCCG |
| Mm.39090  | NM_010350 | <i>Grin2c</i> | Glutamate receptor, ionotropic, NMDA2A (epsilon 3) | CTACCCGTAC<br>TGGTCCCGC          | CTTTGCCGGGT<br>TCCTTGCA  |
| Mm.322594 | NM_008172 | <i>Grin2d</i> | Glutamate receptor, ionotropic, NMDA2A (epsilon 4) | CAGCGGCACT<br>TGCATCAGAG         | TGCAGCATCTC<br>TTCTCCGGG |
| Mm.196692 | NM_133442 | <i>Grip1</i>  | Glutamate receptor interacting protein 1           | AGCAGGAGA<br>GAGAGGAAT<br>TCAAGG | CCCACATCCAG<br>CTGGTCACT |

|           |                  |               |                                    |                                 |                            |
|-----------|------------------|---------------|------------------------------------|---------------------------------|----------------------------|
| Mm.391904 | NM_016976        | <i>Grm1</i>   | Glutamate receptor, metabotropic 1 | GCTGCAGTCC<br>TCTGACCTGA        | TCCGCTTCTTC<br>CTGCTGGTC   |
| Mm.410822 | NM_001160<br>353 | <i>Grm2</i>   | Glutamate receptor, metabotropic 2 | TGGCGGCTCC<br>TACAGTGATG        | GCACGGTGCG<br>AGCAAAGTAA   |
| Mm.318966 | NM_181850        | <i>Grm3</i>   | Glutamate receptor, metabotropic 3 | AGGAGTCATT<br>GGCGGTTCGT        | GTCGCTGAGTT<br>TGGCACTGG   |
| Mm.358940 | NM_001013<br>385 | <i>Grm4</i>   | Glutamate receptor, metabotropic 4 | TACACCACCT<br>GCATCGTCTG<br>G   | TGGCGGGCTG<br>AATTCCACG    |
| Mm.235018 | NM_001081<br>414 | <i>Grm5</i>   | Glutamate receptor, metabotropic 5 | GCAAGTCATC<br>ATCCGCTGCC        | GACTGCTGTCT<br>GGTTGGGGT   |
| Mm.240881 | NM_177328        | <i>Grm7</i>   | Glutamate receptor, metabotropic 7 | AAACCCAGTG<br>ACAGGCCCA<br>A    | GCCAGGCTGG<br>GTGACAGAAT   |
| Mm.320732 | NM_008174        | <i>Grm8</i>   | Glutamate receptor, metabotropic 8 | AATCTGAACT<br>TGCTCGGCCA        | TTTCCAACAGA<br>TCCTCCGTTCA |
| Mm.37533  | NM_152134        | <i>Homer1</i> | Homer homolog 1 (Drosophila)       | TATGGCAGGG<br>GTGGTAGCAA<br>A   | TAACTGCATGC<br>TTGCTGGTGG  |
| Mm.268521 | NM_010512        | <i>Igf1</i>   | Insulin-like growth factor 1       | TGCTCTAACA<br>TCTCCCATCT<br>CTC | GCGCCAGGTA<br>GAAGAGGTGT   |
| Mm.8042   | NM_008380        | <i>Inhba</i>  | Inhibin beta-A                     | GGGGGAGAA<br>CGGGTATGTG<br>G    | ACACTTCTGCA<br>CGCTCCACT   |
| Mm.275071 | NM_010591        | <i>Jun</i>    | Jun oncogene                       | GCTACCGGCC<br>AGCAACTTTC        | CAGTCTCGGTG<br>GCAGCCTTA   |
| Mm.1167   | NM_008416        | <i>Junb</i>   | Jun-B oncogene                     | CATCCACGGC<br>CAACATGCTC        | AACGTTTGCAA<br>CTGCTGCGT   |

## SUPPLEMENTAL REFERENCES

1. Roy A, Jana M, Corbett GT, Ramaswamy S, Kordower JH, Gonzalez FJ, and Pahan K. Regulation of cyclic AMP response element binding and hippocampal plasticity-related genes by peroxisome proliferator-activated receptor alpha. *Cell Rep*. 2013;4(4):724-37.
2. Roy A, Modi KK, Khasnavis S, Ghosh S, Watson R, and Pahan K. Enhancement of morphological plasticity in hippocampal neurons by a physically modified saline via phosphatidylinositol-3 kinase. *PLoS One*. 2014;9(7):e101883.
3. Jana M, Jana A, Pal U, and Pahan K. A simplified method for isolating highly purified neurons, oligodendrocytes, astrocytes, and microglia from the same human fetal brain tissue. *Neurochem Res*. 2007;32(12):2015-22.
4. Roy A, Jana M, Kundu M, Corbett GT, Rangaswamy SB, Mishra RK, Luan CH, Gonzalez FJ, and Pahan K. HMG-CoA Reductase Inhibitors Bind to PPARalpha to Upregulate Neurotrophin Expression in the Brain and Improve Memory in Mice. *Cell Metab*. 2015;22(2):253-65.
5. Corbett GT, Roy A, and Pahan K. Sodium phenylbutyrate enhances astrocytic neurotrophin synthesis via protein kinase C (PKC)-mediated activation of cAMP-response element-binding protein (CREB): implications for Alzheimer disease therapy. *J Biol Chem*. 2013;288(12):8299-312.
6. Patel D, Roy A, Kundu M, Jana M, Luan CH, Gonzalez FJ, and Pahan K. Aspirin binds to PPAR $\alpha$  to stimulate hippocampal plasticity and protect memory. *Proc Natl Acad Sci U S A*. 2018;115(31):E7408-E17.
7. Khasnavis S, Roy A, Ghosh S, Watson R, and Pahan K. Protection of dopaminergic neurons in a mouse model of Parkinson's disease by a physically-modified saline containing charge-stabilized nanobubbles. *J Neuroimmune Pharmacol*. 2013;9(2):218-32.
8. Ghosh A, Roy A, Liu X, Kordower JH, Mufson EJ, Hartley DM, Ghosh S, Mosley RL, Gendelman HE, and Pahan K. Selective inhibition of NF-kappaB activation prevents dopaminergic neuronal loss in a mouse model of Parkinson's disease. *Proc Natl Acad Sci U S A*. 2007;104(47):18754-9.
9. Mansuy IM, Mayford M, Jacob B, Kandel ER, and Bach ME. Restricted and regulated overexpression reveals calcineurin as a key component in the transition from short-term to long-term memory. *Cell*. 1998;92(1):39-49.
10. Galeano P, Martino Adami PV, Do Carmo S, Blanco E, Rotondaro C, Capani F, Castano EM, Cuello AC, and Morelli L. Longitudinal analysis of the behavioral phenotype in a novel

transgenic rat model of early stages of Alzheimer's disease. *Front Behav Neurosci.* 2014;8(321).

11. Chen Y, Liang Z, Blanchard J, Dai CL, Sun S, Lee MH, Grundke-Iqbal I, Iqbal K, Liu F, and Gong CX. A non-transgenic mouse model (icv-STZ mouse) of Alzheimer's disease: similarities to and differences from the transgenic model (3xTg-AD mouse). *Mol Neurobiol.* 2013;47(2):711-25.

## LEGENDS TO SUPPLEMENTAL FIGURES

**Figure S1. Monitoring Hex in hippocampus with the help of EI-GCMS method.** Representative plots are for relative abundance of hex in the hippocampi of (A) NTG, (B) Veh-fed 5xFAD and (C) Hex-fed 5xFAD mice. Analysis was done in ISQ7000 single quadrupole mass spectrometer and quantified at Chromeleon 7 chromatography studio. (*Inset*) Magnified views of enclosed squares of (a) NTG, (b) Veh-fed 5xFAD and (c) Hex-fed 5xFAD mice were displayed next to the uncut image.

**Figure S2. Unmerged images of merged immunolabeled images in Fig 4C.** (A) Corresponding unmerged images of hippocampal sections derived from mice across all groups, shown in upper panel of *Fig. 4C* that are double-labeled with BDNF (red) and MAP2 (green). (B) Corresponding unmerged images of hippocampal sections derived from mice across all groups, shown lower panel of *Fig. 4C* that are double-labeled with PSD95 (red) and MAP2 (green). The hippocampal sections used for double-labeling are 40 micron thick. Nuclei were counterstained with DAPI (blue). Scale bars 50  $\mu$ m.

**Figure S3. Generation of 5xFAD<sup>Ppara-ΔHippo</sup> mice.** Age-matched *Ppara*<sup>ΔHippo</sup> mice were crossed with 5xFAD mice to generate littermates heterozygous for both *Ppara*<sup>ΔHippo</sup> allele and 5xFAD transgenes (*APP* and *PSEN1*). These mice were then backcrossed with homozygous *Ppara*<sup>ΔHippo</sup> mice to generate ~25% 5xFAD<sup>Ppara-ΔHippo</sup> mice. Homozygous 5xFAD<sup>Ppara-ΔHippo</sup> mice were further bred up to F4 generation. The genomic DNA isolated from tails of littermates born to breeding pairs made from F4 generation were then analyzed by qualitative RT-PCR using primers against APP/PSEN transgenes, *Camk2a*<sup>Cre</sup> alleles and *Ppara*<sup>flox</sup> alleles (**Table S2**).

**Figure S4. Hexadecanamide improves short-term memory in 5xFAD mice via hippocampal PPAR $\alpha$ .** 6 to 7 months-old 5xFAD, 5xFAD<sup>Ppara-null</sup> mice and 5xFAD<sup>Ppara-ΔHippo</sup> mice ( $n=6/\text{group}$ ) were orally treated with Hex (5mg/kg) for 30 days orally. Following Hex treatment, the recognition memory was evaluated on an open field apparatus using the *Noldus software*. (A) representative heat maps and track plots of mice movement during novel object recognition test (NORT), generated by *Noldus software*. (B) Preferential index for novel object among mice across all groups. Results are represented as mean  $\pm$  SEM. One-way ANOVA [NORT preferential index:  $F_{(6, 35)} = 4.7986$ ,  $p = 0.01$ ], followed by *Bonferroni's* multiple comparisons test was used to assess the significance of the mean; \* $p < 0.05$  vs Veh-fed 5xFAD; \*\* $p < 0.01$  vs Veh-fed 5xFAD; <sup>ns</sup> $p > 0.05$  vs Veh-fed 5xFAD; ns – not significant.



**Figure S5. Global and hippocampal deletion of PPAR $\alpha$  does not influence locomotor function in hexadecanamide-treated 5xFAD mice.** 6 to 7 months-old 5xFAD and 5xFAD<sup>PPAR $\alpha$ -null</sup> transgenic mice ( $n=6/group$ ) were orally treated with Hex (5 mg/kg body wt.) for 30 days orally. Following Hex treatment, the locomotor activity was evaluated on an open field apparatus using the *Noldus software*. (A) representative heat maps of locomotor activity of mice across all groups during open field test (OFT), generated by *Noldus software*. (B-C) Corresponding OFT parameter analyses; (B) total distance moved and (C) Velocity. Results are represented as mean  $\pm$  SEM. One-way ANOVA [OFT total distance moved:  $F_{(6, 35)} = 1.3101$ ,  $p = 0.279$  and OFT velocity  $F_{(6, 35)} = 1.3164$ ,  $p = 0.276$ ], followed by *Bonferroni's* multiple comparisons test was used to assess the significance of the mean; <sup>ns</sup> $p > 0.05$  vs Veh-fed 5xFAD; ns – not significant.

**Figure S6. Uncropped western blot images.** (A) Corresponding uncropped image of western blot shown in Fig. 1C. (B) Corresponding uncropped image of western blot shown in Fig. 1F. (C) Corresponding uncropped image of western blot shown in Fig. 1I. (D-F) Corresponding uncropped images of western blots for BDNF (D),  $\beta$ actin (E), PSD95 (E), GluR1 (F) and NR2A (G), shown in Fig. 2C. (H-I) Corresponding uncropped images of western blots for BDNF (H), PSD95 (I) and  $\beta$ actin (I), shown in Fig. 5A. Red dotted box represents the cropped area for a particular protein depicted to the right of the images. The protein standards are depicted to the left of the images.

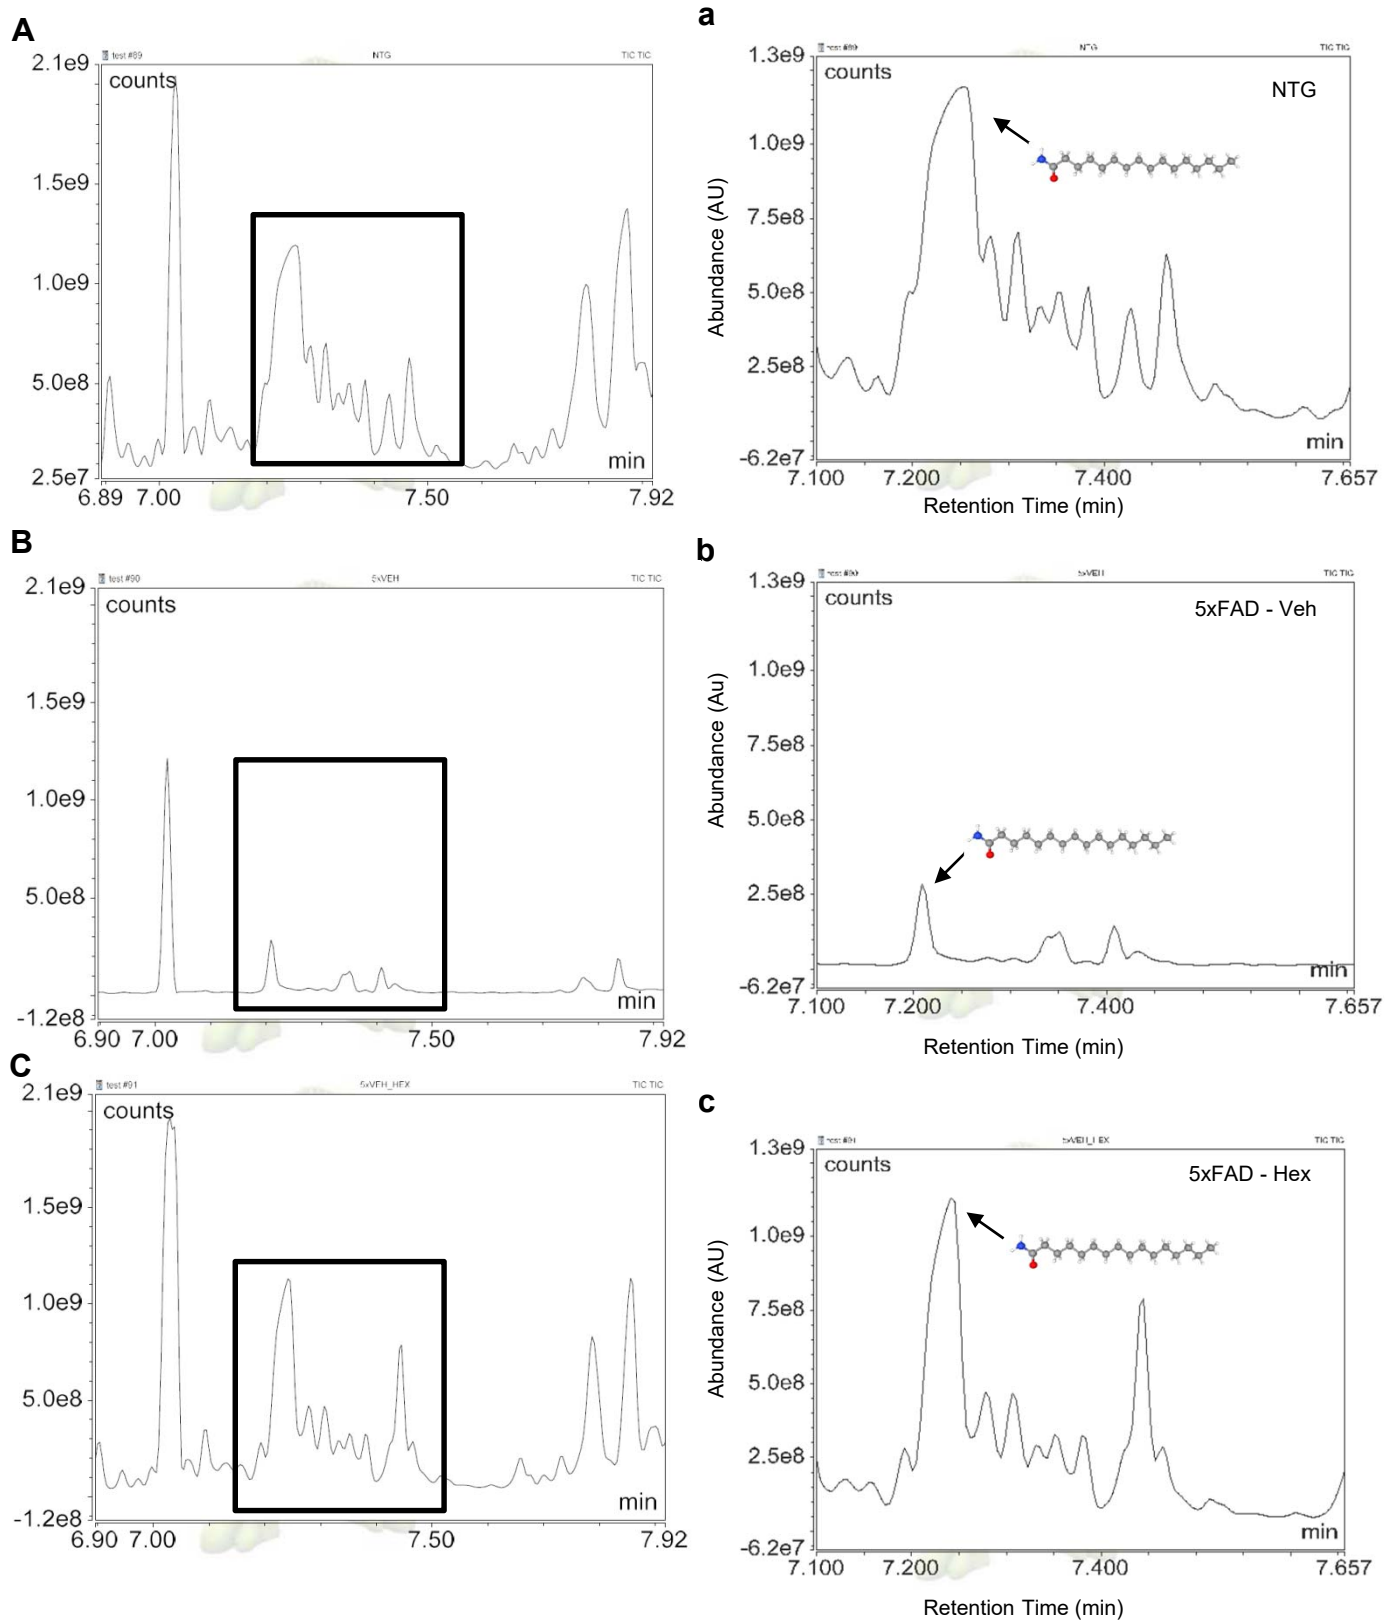

**Figure S1.**

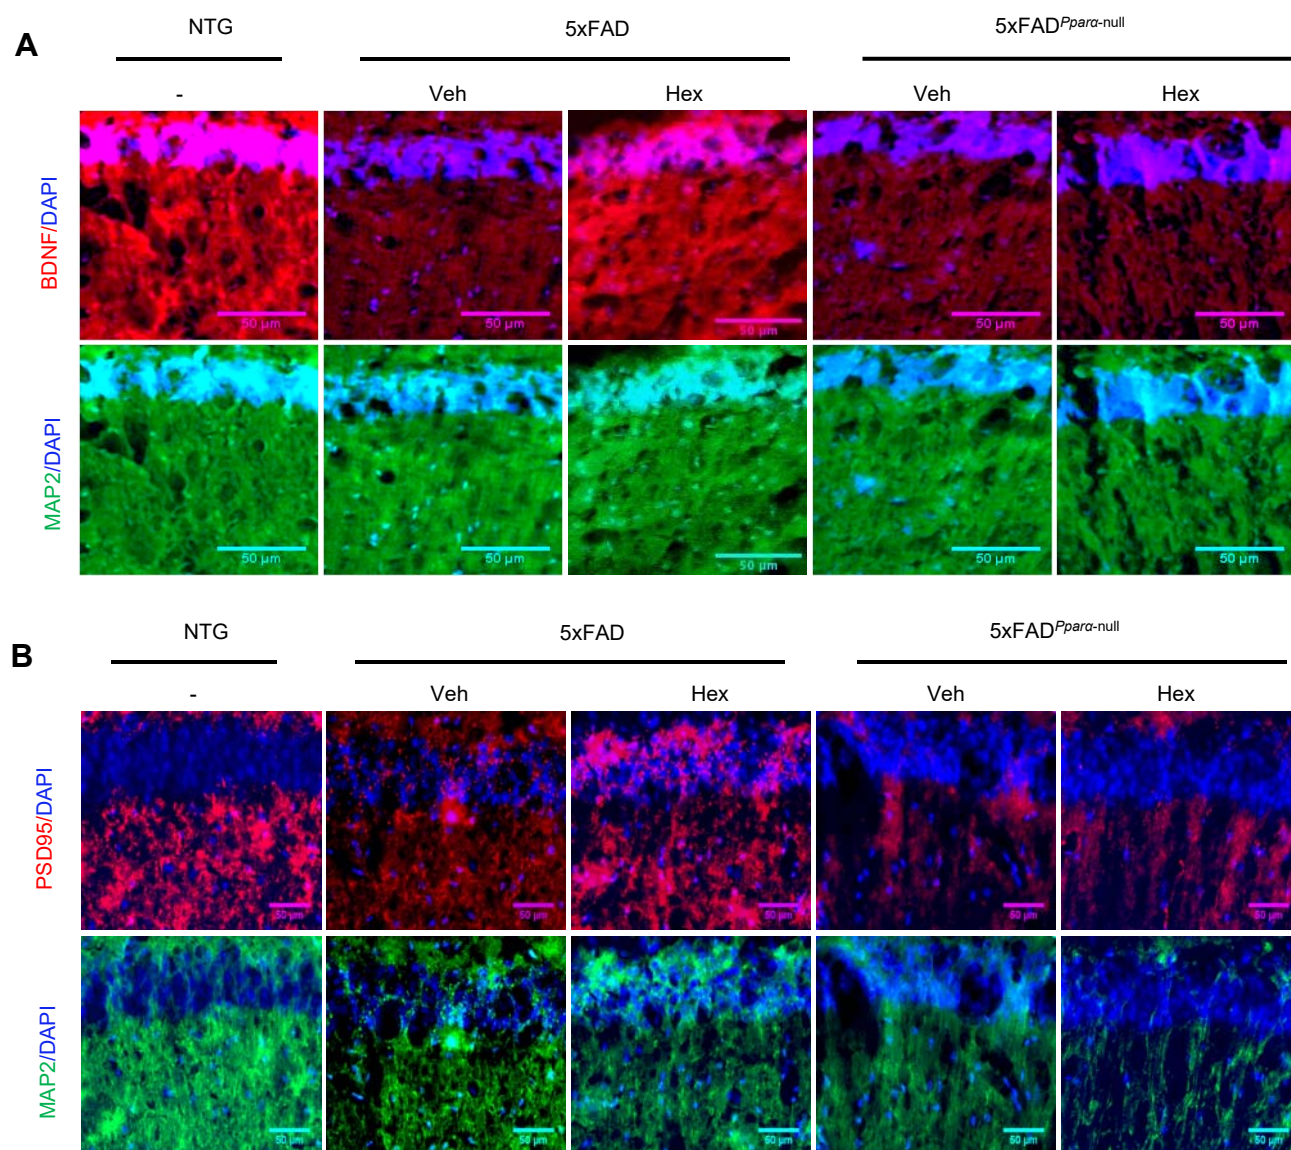

**Figure S2**

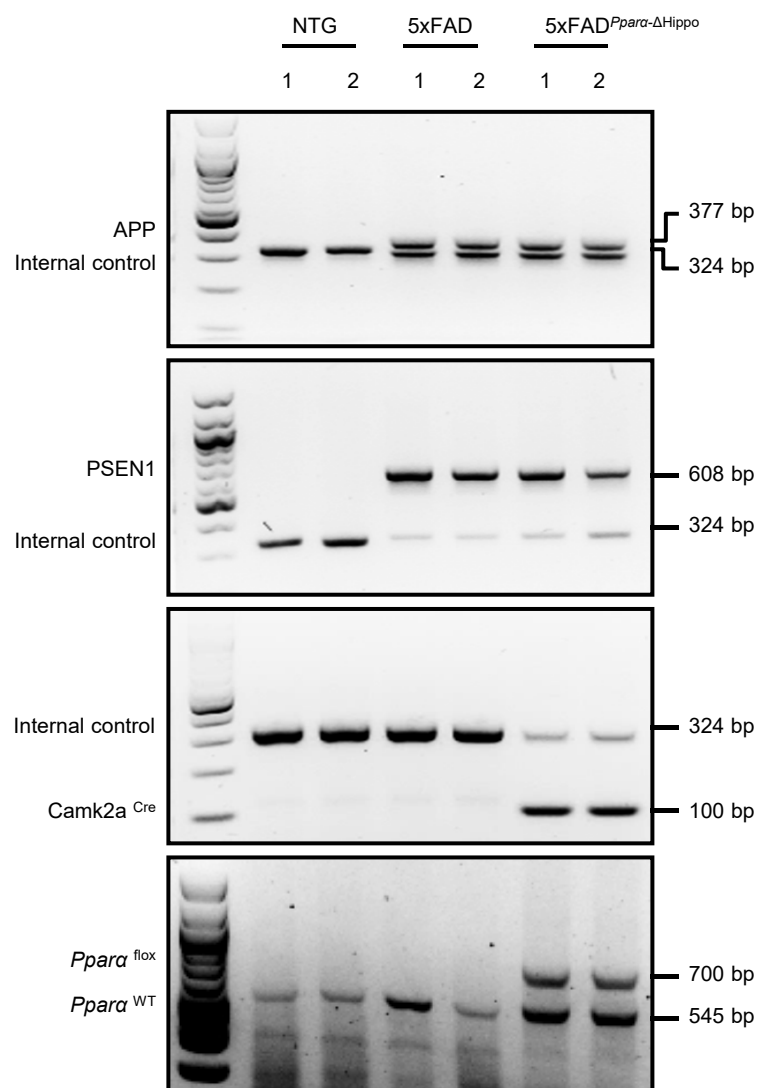

**Figure S3.**

**A**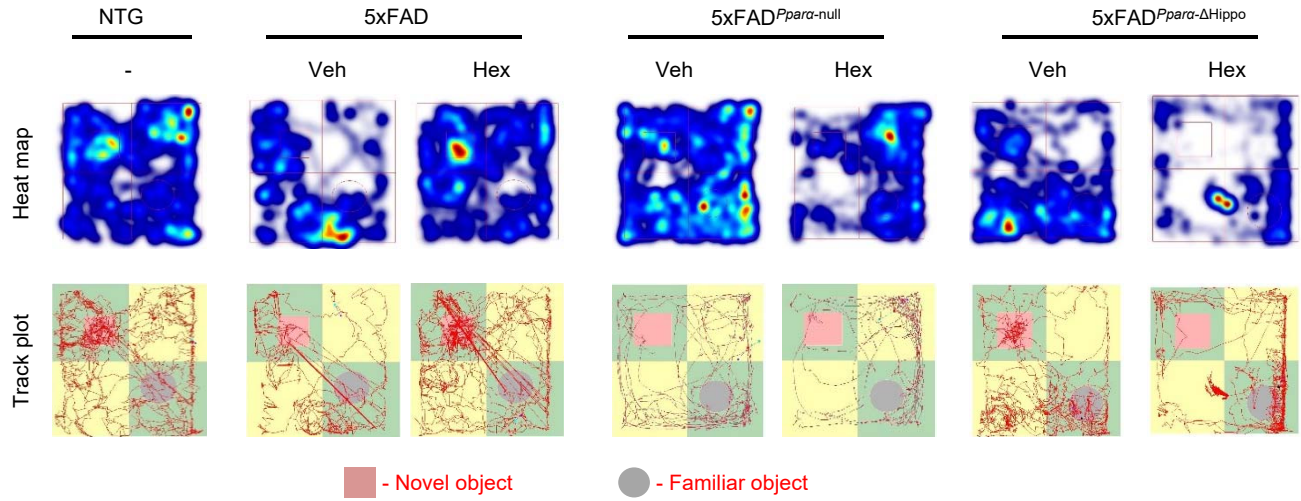**B**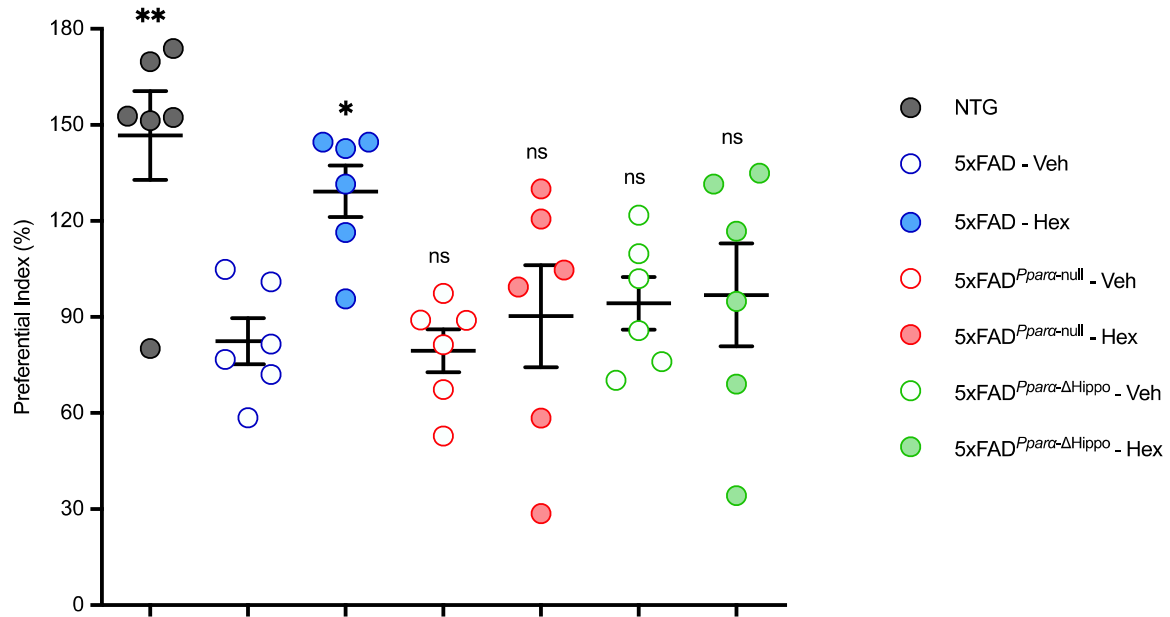**Figure S4.**

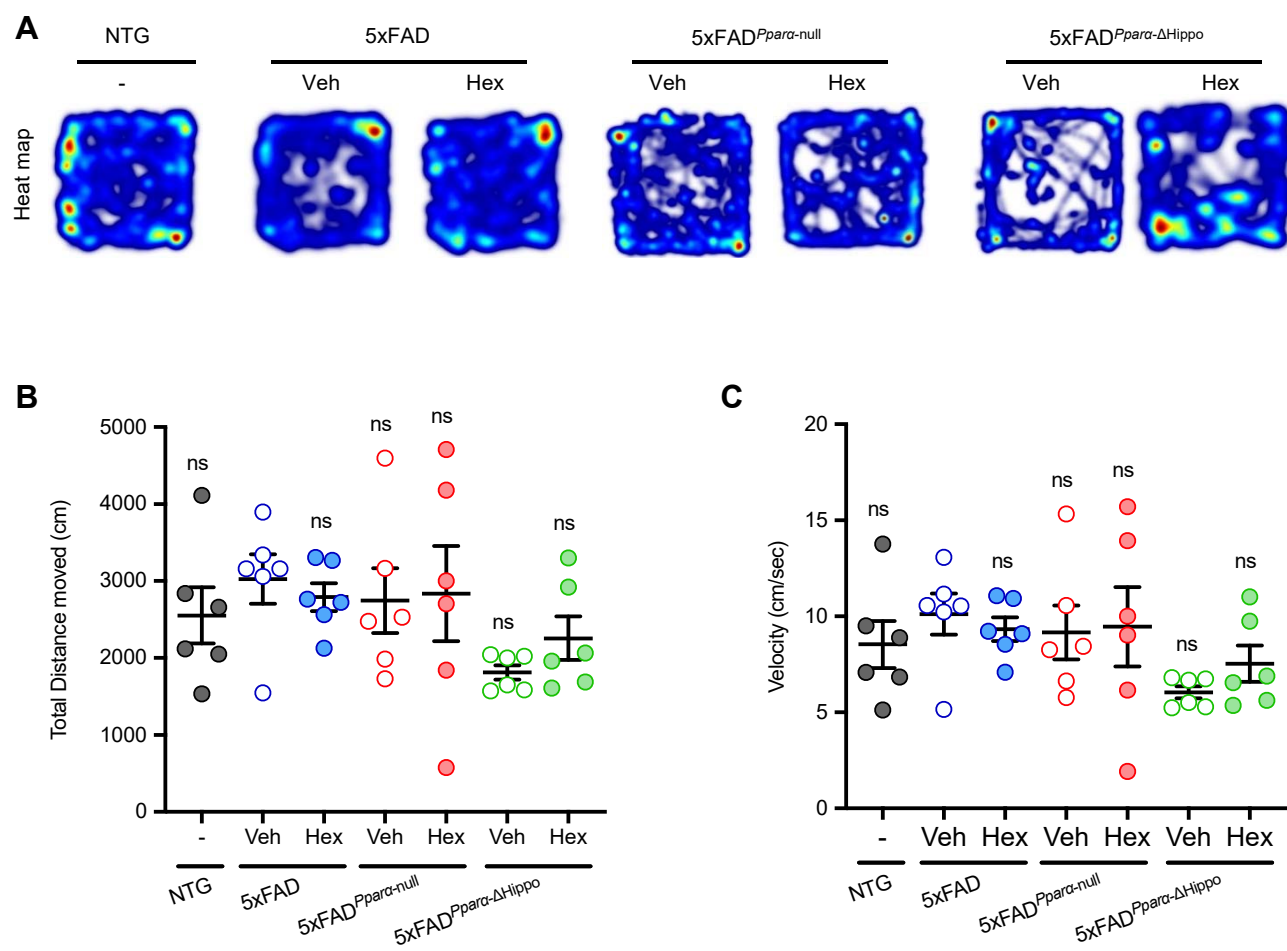

**Figure S5.**



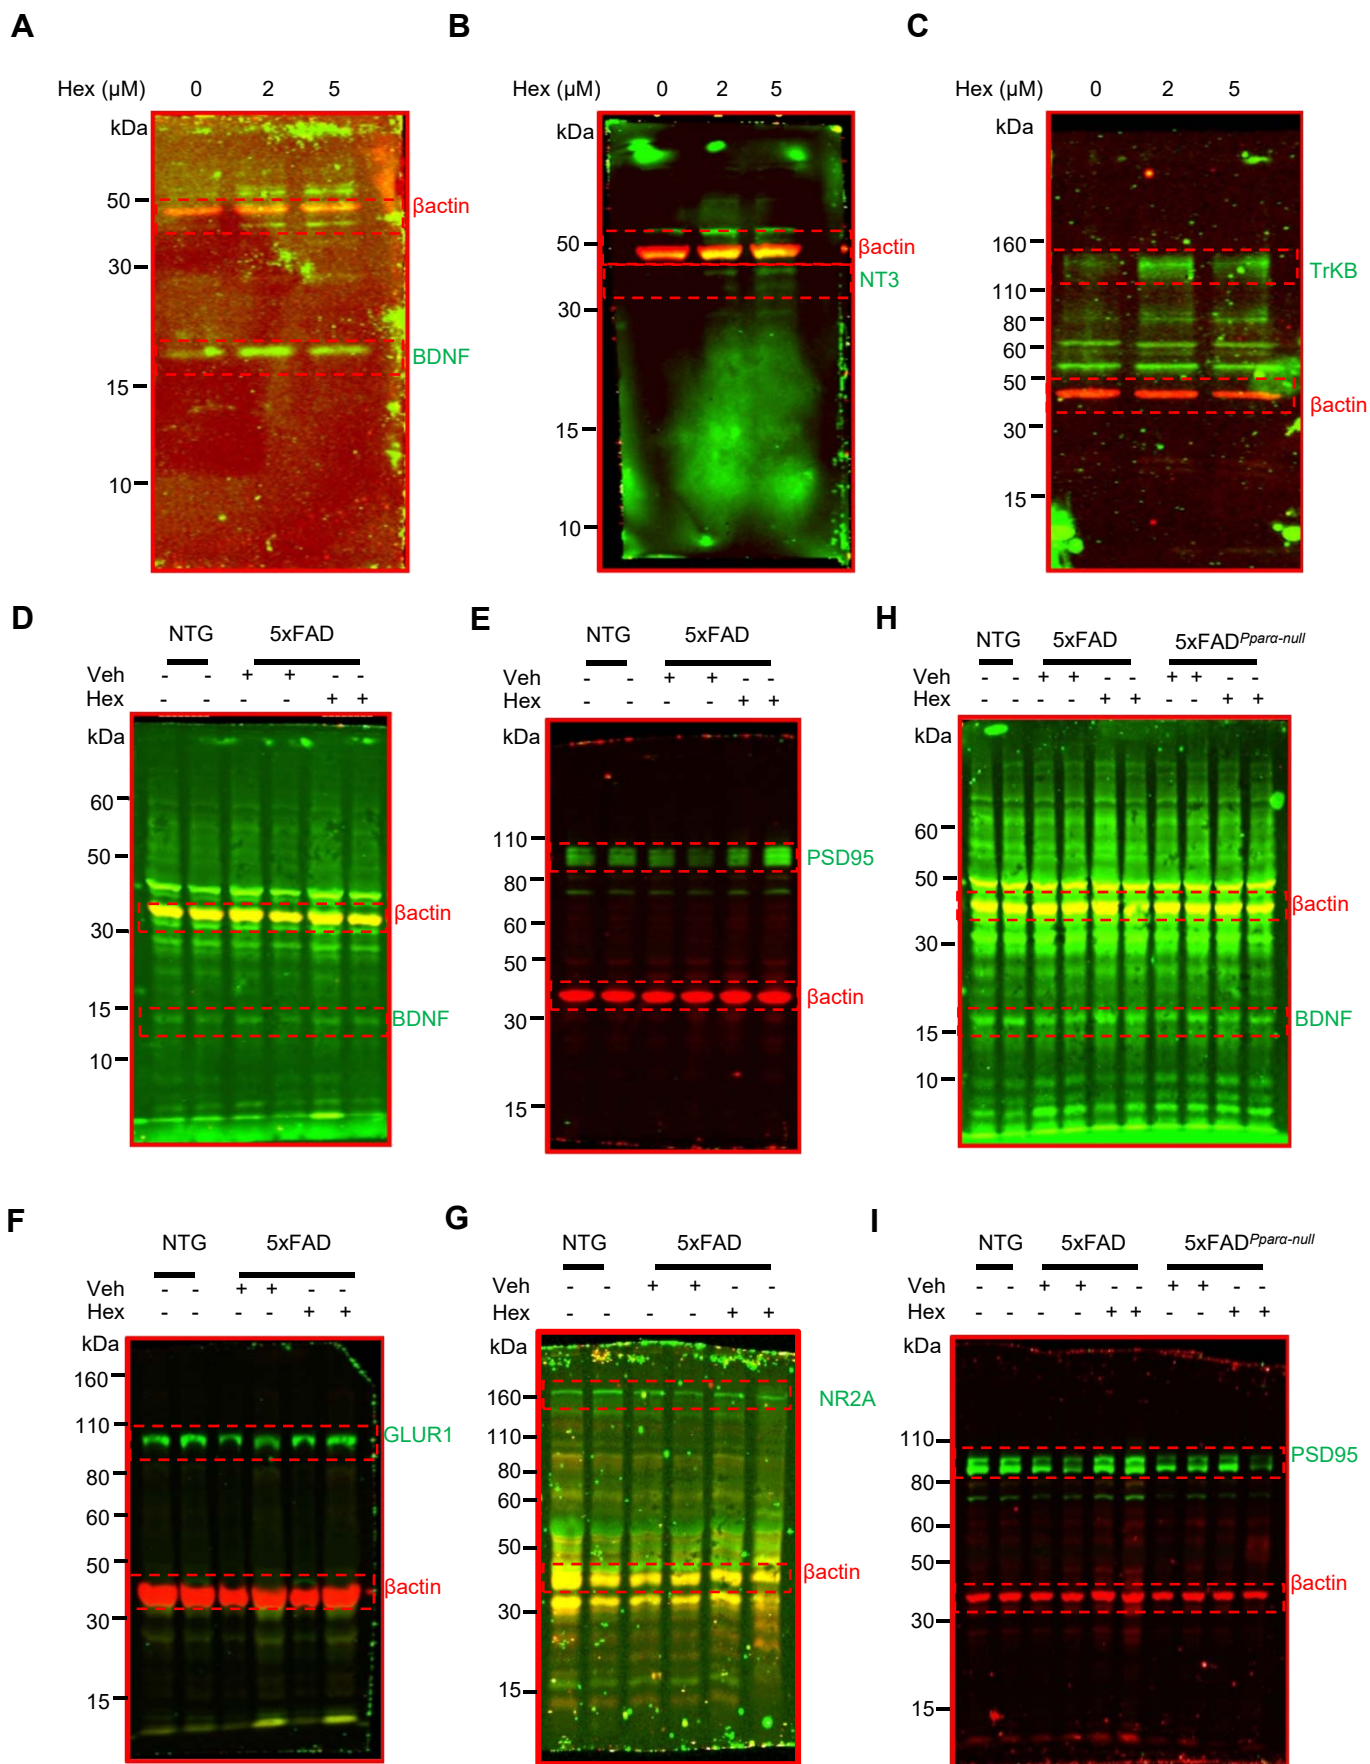

**Figure S6.**
